# Supplementary material for: Confinement of all-inorganic perovskite quantum dots assembled in metal–organic frameworks for ultrafast scintillator application
Source: Royal Society of Chemistry journal article supplement (doi:10.1039/d1nr08120a), 2022-01-01
Supplement: d1nr08120a3.pdf [file d1nr08120a3.pdf]

**Supplementary Information for:**

**Confinement of all inorganic perovskite quantum dots assembled in  
metal-organic framework for ultrafast scintillator application**

Cewei Ren<sup>a</sup>, Zhanpeng Li<sup>a</sup>, Lu Huang<sup>\*a</sup>, Xinlin Xiong<sup>a</sup>, Ziqi Nie<sup>a</sup>, Yunling  
Yang<sup>a</sup>, Wenqing Zhu<sup>a</sup>, Weiguang Yang<sup>a</sup> and Linjun Wang<sup>a,b</sup>

a. School of Materials Science and Engineering, Shanghai University,  
Shanghai, 200444, China

b. Zhejiang Institute of Advanced Materials, Shanghai University,  
Jiashan, 314113, China

**Corresponding Author:**

Lu Huang

E-mail: [huanglu@shu.edu.cn](mailto:huanglu@shu.edu.cn)

Address: No. 333 Nanchen Road, Shanghai 200444, China

# Table of contents

|                                               |    |
|-----------------------------------------------|----|
| Figure S1 .....                               | 3  |
| Figure S2 .....                               | 4  |
| Figure S3 .....                               | 5  |
| Table S1 Previous research in this field..... | 6  |
| Explanation 1 .....                           | 7  |
| Explanation 2 .....                           | 9  |
| References: .....                             | 10 |

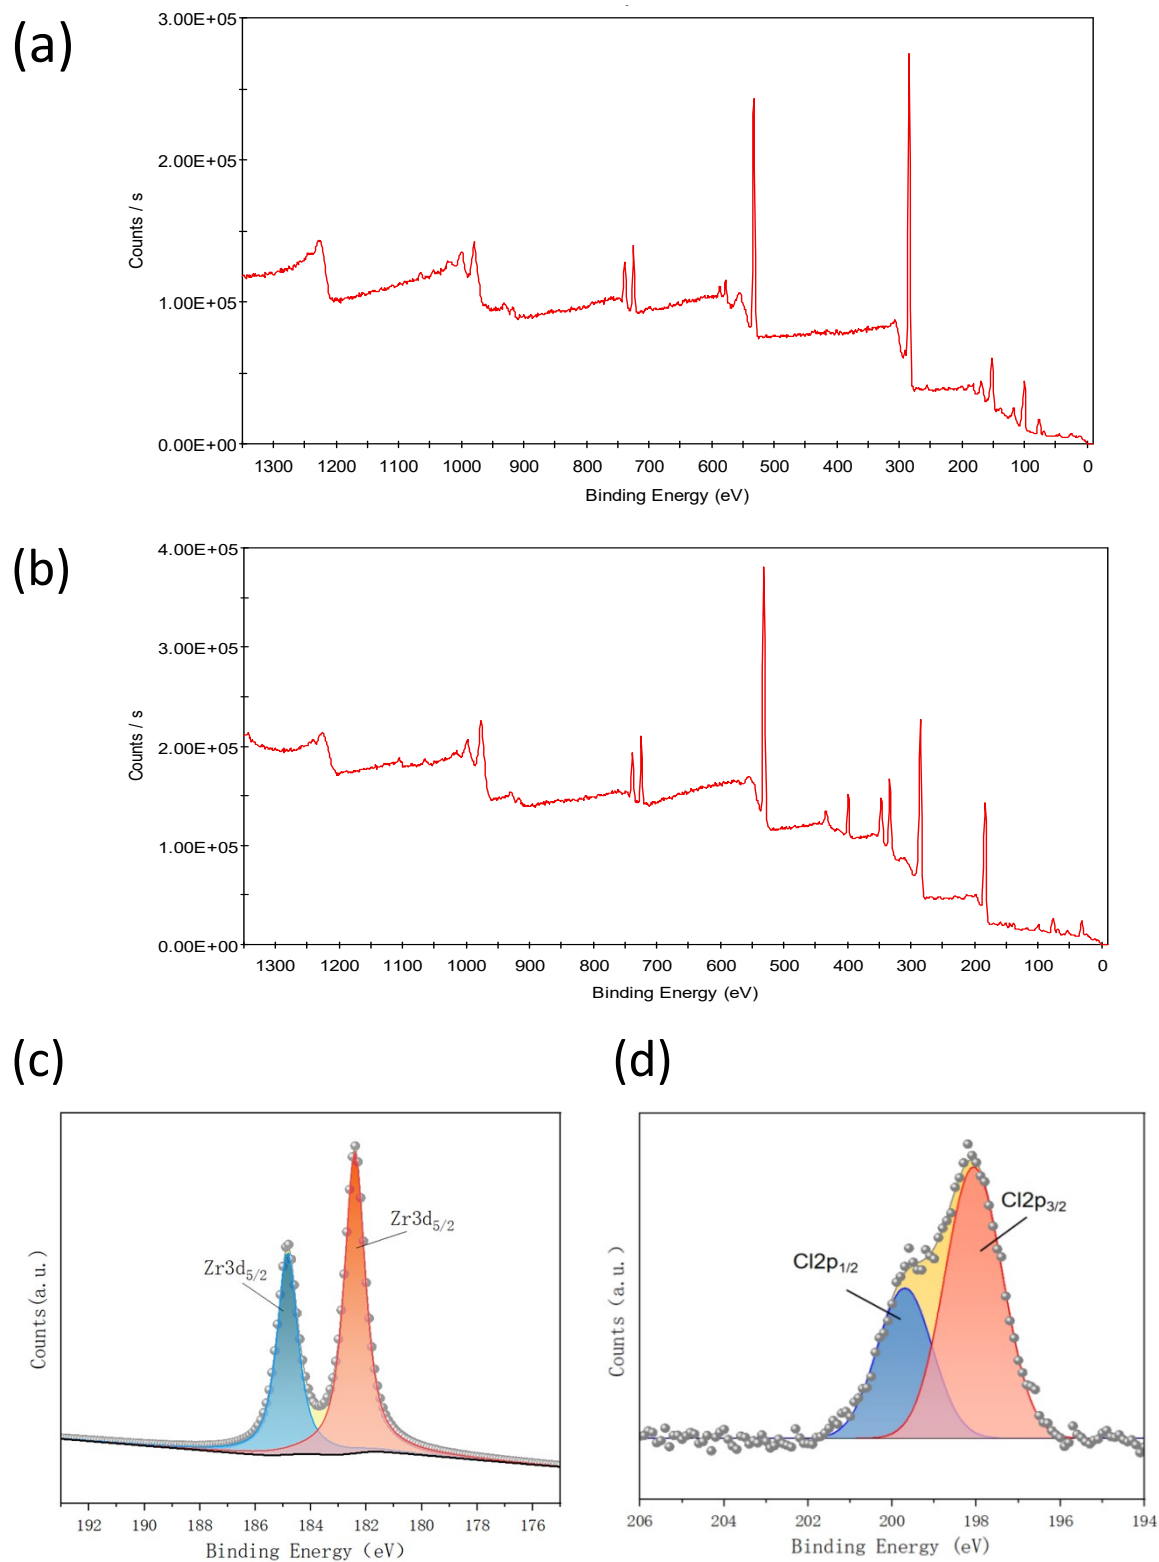

Figure S1 (a) CsPbCl<sub>2</sub>Br@MIL-101(Cr) XPS full spectrum scan results (b) CsPbCl<sub>2</sub>Br@UiO-67-bpy XPS full spectrum scan results (c) XPS scanning spectrum of Zr (d) XPS scanning spectrum of Cl.

(a)

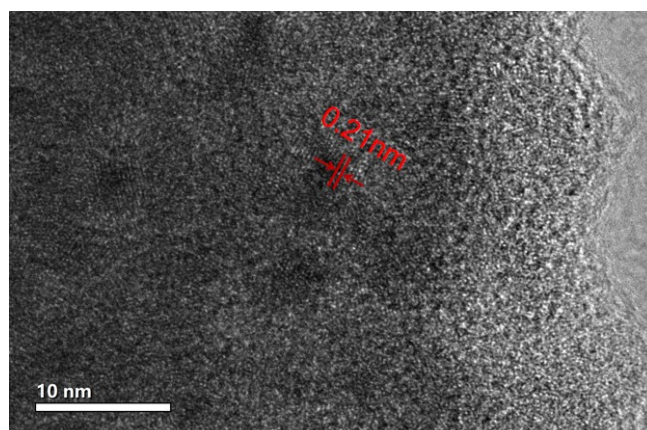

(b)

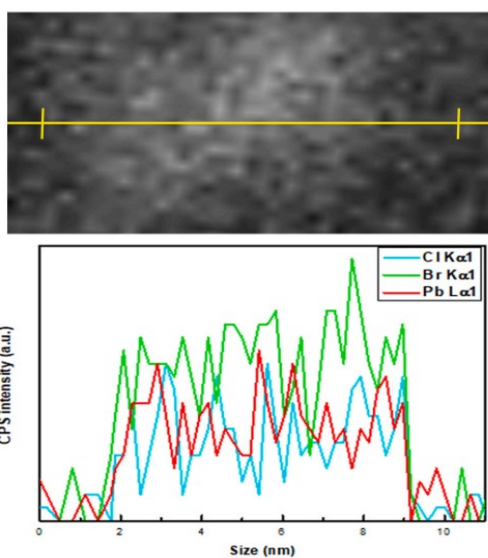

(c)

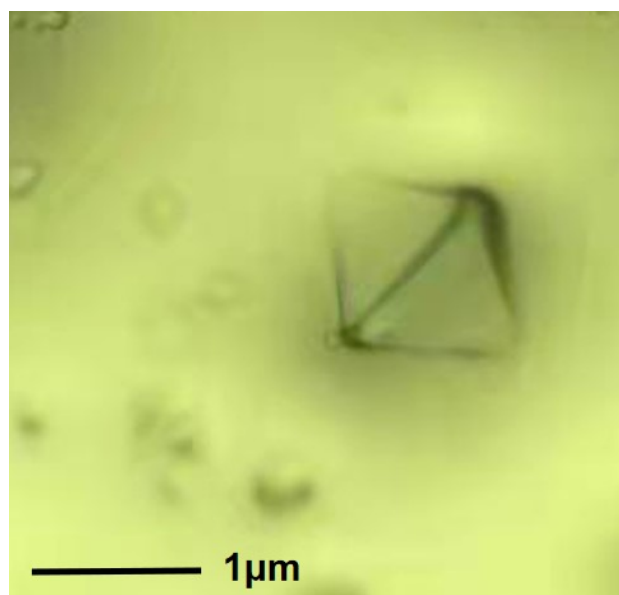

Figure S2 (a) TEM observations CsPbCl<sub>2</sub>Br@UiO-67-bpy see perovskite quantum dot lattice fringes; (b) A line scan was performed on suspected quantum dots to determine elements; (c) Metallographic microscopic image of single MIL-101 (Cr) grain.

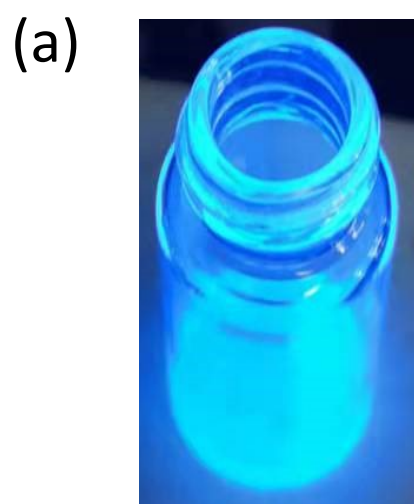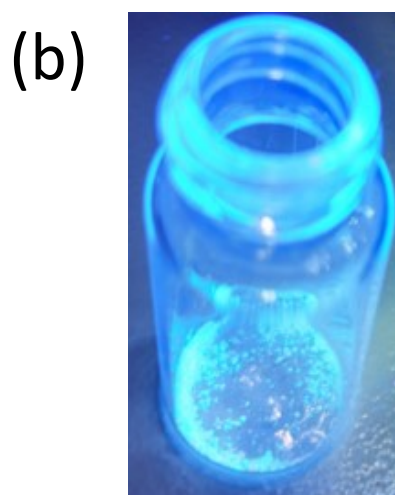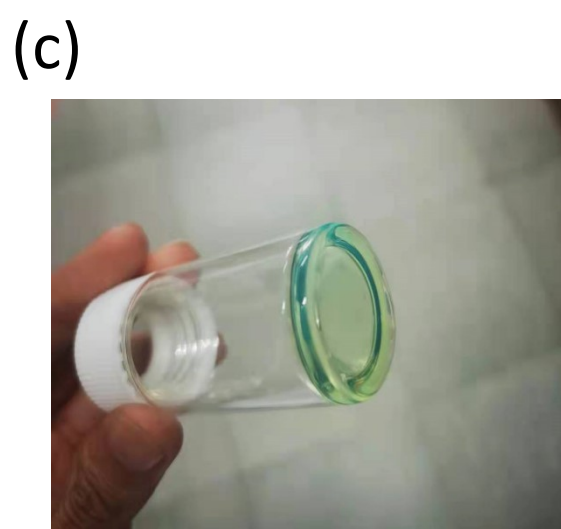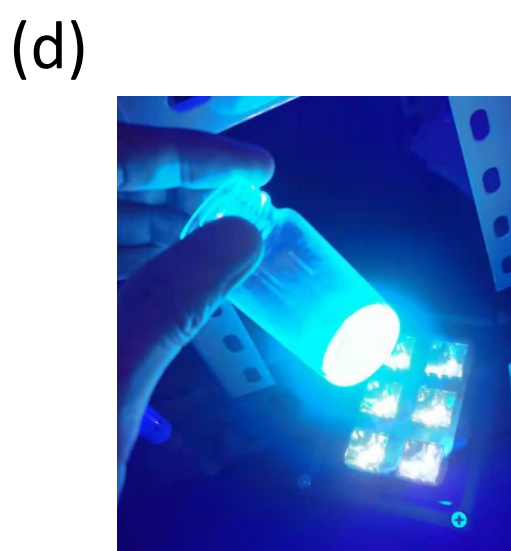

**Figure S3** (a)  $\text{CsPbCl}_2\text{Br@MIL-101}(\text{Cr})$  dissolved in toluene emits blue light under 365 nm excitation; (b)  $\text{CsPbCl}_2\text{Br@MIL-101}(\text{Cr})$  powder emits blue light under 365 nm excitation; (c) scintillation composite after curing; (d) The solidified scintillation composite emits blue light under excitation of 365 nm.

Table S1 Previous research in this field

| QDs                                               | Constraint materials/MOF | Application                       | Year | Reference |
|---------------------------------------------------|--------------------------|-----------------------------------|------|-----------|
| ABX <sub>3</sub>                                  | Oleamine, oleic acid     | display fields                    | 2016 | [1]       |
| CsPbX <sub>3</sub>                                | SiOx                     | scintillant                       | 2018 | [2]       |
| CH <sub>3</sub> NH <sub>3</sub> PbBr <sub>3</sub> | MOF-5                    | metal ion detection               | 2018 | [3]       |
| CH <sub>3</sub> NH <sub>3</sub> PbBr <sub>3</sub> | EuBTC                    | anti-counterfeiting               | 2018 | [4]       |
| CsPbX <sub>3</sub>                                | MIL-101 (Cr)             | Tunable emission                  | 2019 | [5]       |
| MAPbI <sub>3</sub>                                | UiO-66                   | Solar cell                        | 2019 | [6]       |
| CsPbX <sub>3</sub>                                | UiO-67                   | LED                               | 2019 | [7]       |
| MAPbBr <sub>3</sub>                               | ZIF-8                    | degradation of organic pollutants | 2019 | [8]       |
| MAPbBr <sub>3</sub>                               | MA-Mn(HCOO) <sub>3</sub> | Solar cell                        | 2020 | [9]       |
| CsPbBr <sub>3</sub> /<br>MAPbBr <sub>3</sub>      | MIL-101 (Cr)             | Tunable emission                  | 2021 | [10]      |

## Explanation 1

**The reason for choosing CsPbCl<sub>2</sub>Br** is that in our initial experiment, we tried CsPbCl<sub>3-x</sub>Br<sub>x</sub> (x=0~3) and recorded the performance data when x was set to different values. We found that when x=0~1, the material was very unstable and easy to fluorescence quenching. But when X>1, with the increase of x, the spectrum will gradually red-shift and the lifetime will also gradually increase, which is contrary to the pursuit of ultra-fast scintillation. Therefore, we decided to choose CsPbCl<sub>2</sub>Br in consideration of scintillation performance and material stability. Specific implementation methods and experimental data analysis are as follows.

### **CsPbCl<sub>3</sub>@MOF(x=0):**

Dissolve 2.8 mg PbCl<sub>2</sub> in 1mL DMF, stir at 100 degrees until completely dissolved, then disperse 15mg MOF powder in it, stir fully for 12 hours to ensure part of PbCl<sub>2</sub> into the MOF cages. The supernatant was removed and PbCl<sub>2</sub> that did not enter the cages were washed away. Finally, PbCl<sub>2</sub>@MOF powder was obtained and dissolved in 1mL toluene solution for later use. 84 mg CsCl (0.5mmol) was dissolved in 1 mL methanol and stirred at 60°C until completely dissolved as the precursor solution. PbCl<sub>2</sub>@MOF, previously dispersed with toluene, was transferred into a beaker and stirred vigorously. Then 30 μL CsCl precursor was quickly dropped into the beaker with a pipette gun. After intense stirring, washing and drying, CsPbCl<sub>3</sub>@MOF powder was finally obtained.

### **CsPbCl<sub>2</sub>Br@MOF(x=1):**

Dissolve 2.8 mg PbCl<sub>2</sub> in 1mL DMF, stir at 100 degrees until completely dissolved, then disperse 15mg MOF powder in it, stir fully for 12 hours to ensure part of PbCl<sub>2</sub> into the MOF cages. The supernatant was removed and PbCl<sub>2</sub> that did not enter the cages were washed away. Finally, PbCl<sub>2</sub>@MOF powder was obtained and dissolved in 1mL toluene solution for later use. 106 mg CsBr (0.5mmol) was dissolved in 1 mL methanol and stirred at 60°C until completely dissolved as the precursor solution. PbCl<sub>2</sub>@MOF, previously dispersed with toluene, was transferred into a beaker and stirred vigorously. Then 30 μL CsBr precursor was quickly dropped into the beaker with a pipette gun. After intense stirring, washing and drying, CsPbCl<sub>2</sub>Br@MOF powder was finally obtained.

### **CsPbClBr<sub>2</sub>@MOF(x=2):**

Dissolve 3.6 mg PbBr<sub>2</sub> in 1mL DMF, stir at 100 degrees until completely dissolved, then disperse 15mg MOF powder in it, stir fully for 12 hours to ensure part of PbBr<sub>2</sub> into the MOF cages. The supernatant was removed and PbBr<sub>2</sub> that did not enter the cages were washed away. Finally, PbBr<sub>2</sub>@MOF powder was obtained and dissolved in 1mL toluene solution for later use. 84 mg CsCl (0.5mmol) was dissolved in 1 mL methanol and stirred at 60°C until completely dissolved as the precursor solution. PbBr<sub>2</sub>@MOF, previously dispersed with toluene, was transferred into a beaker and stirred vigorously. Then 30 μL CsCl precursor was quickly dropped into the beaker with a pipette gun. After intense stirring, washing and drying, CsPbCl<sub>2</sub>Br@MOF powder was finally obtained.

### **CsPbBr<sub>3</sub>@MOF(x=3):**

Dissolve 3.6 mg PbBr<sub>2</sub> in 1mL DMF, stir at 100 degrees until completely dissolved, then disperse 15mg MOF powder in it, stir fully for 12 hours to ensure part of PbBr<sub>2</sub> into the MOF cages. The supernatant was removed and PbBr<sub>2</sub> that did not enter the cages were washed away.

Finally,  $\text{PbBr}_2@MOF$  powder was obtained and dissolved in 1mL toluene solution for later use. 106 mg  $\text{CsBr}$  (0.5mmol) was dissolved in 1 mL methanol and stirred at  $60^\circ\text{C}$  until completely dissolved as the precursor solution.  $\text{PbBr}_2@MOF$ , previously dispersed with toluene, was transferred into a beaker and stirred vigorously. Then  $30\ \mu\text{L}$   $\text{CsBr}$  precursor was quickly dropped into the beaker with a pipette gun. After intense stirring, washing and drying,  $\text{CsPbBr}_3@MOF$  powder was finally obtained.

According to **Figure S4(a)(b)**, both spectrum and life are  $\text{CsPbCl}_2\text{Br}@MIL-101(\text{Cr})$ , which better meet the requirements of ultrafast scintillation. In addition, according to the TEM image of  $\text{CsPbBr}_3@MIL-101(\text{Cr})$  in **Figure S4(c)**, it can be observed that  $\text{CsPbBr}_3$  is difficult to disperse evenly in the MOF structure due to its large diameter (about 5nm), and the filling rate is not high. Therefore, considering the stability, luminescence characteristics and fast transient life of PeQDs,  $\text{CsPbCl}_2\text{Br}$  quantum dots were selected to be assembled in MOF.

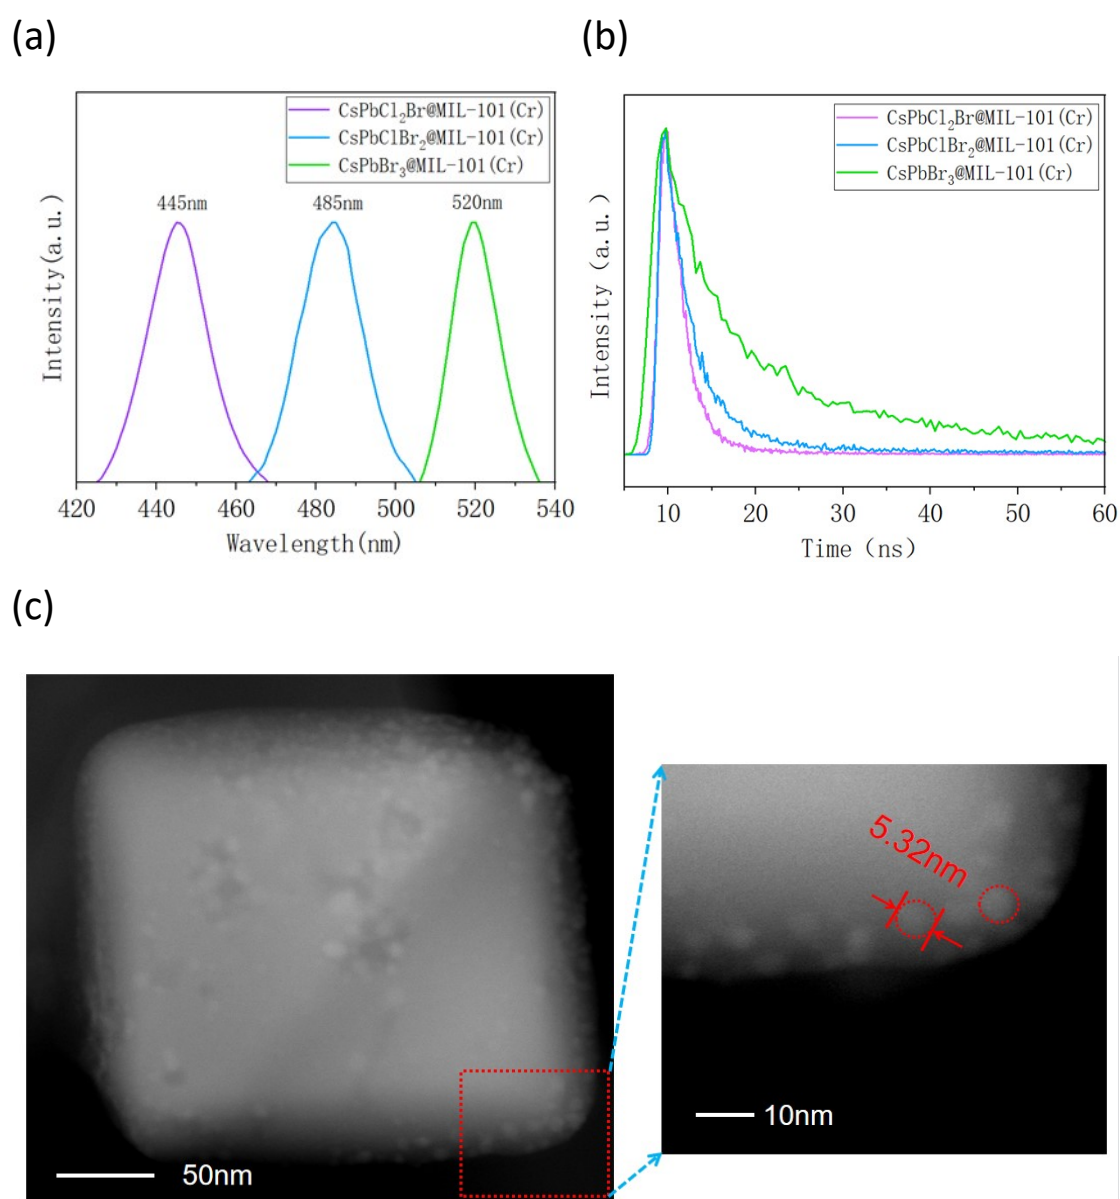

**Figure S4** (a) The PL data of  $\text{CsPbCl}_{3-x}\text{Br}_x @MIL-101(\text{Cr})$  at different values of  $x$ . (b) The Transient lifetime of  $\text{CsPbCl}_3-x\text{Br}_x @MIL-101(\text{Cr})$  at different values of  $x$ . (c) TEM images of  $\text{CsPbBr}_3 @MIL-101(\text{Cr})$



## Explanation 2

The unit body free energy ( $\Delta G_B$ ) is proportional to the logarithm of the saturation ratio ( $S$ , defined as  $S = C/C_s$ ), so  $\Delta G_B$  increases as  $S$  increases. As formula  $\Delta G = \Delta G_V + \Delta G_S = \frac{4}{3}\pi r^3 \Delta G_B + 4\pi r^2$ , the increase of supersaturation ratio  $S$  leads to the increase of absolute value of  $\Delta G_V$ , and  $\Delta G_V$  is negative, so  $\Delta G^*_{Hom}$  decreases, as shown in the **Figure S5**. The influence of supersaturation ratio  $S$  on  $\Delta G^*_{Hom}$  is reflected in the change of luminescence intensity in the preparation of perovskite. When the precursor CsBr solution is further dropped, the luminescence intensity of the material is obviously stronger, indicating that more perovskite is generated.

The critical nucleus radius  $r_0$  is defined as  $d(\Delta G)/dr = 0$ , and the nucleation energy barrier  $\Delta G^*_{Hom}$  is the value of  $G$  when  $r = r_0$  ( $\Delta G^*_{Hom} = \frac{4}{3}\pi r_0^3 \Delta G_B + 4\pi r_0^2$ ). If the size of the nucleus is larger than  $r_0$ , thermal fluctuations induced clusters will be thermodynamically stable and tend to grow further as nucleation centers. To reach the critical nucleation radius  $r_0$ , an energy beyond the nucleation energy barrier  $\Delta G^*_{Hom}$  is required to drive the thermodynamic process.

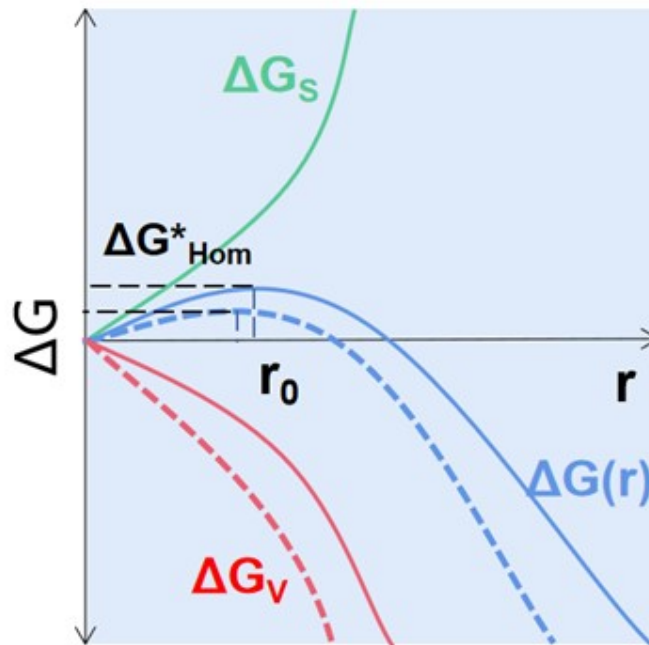

Figure S5 The influence of  $S$  on  $\Delta G_V$ ,  $\Delta G$  and  $\Delta G^*_{Hom}$

## References:

1. X. Li, Y. Wu, S. Zhang, B. Cai, Y. Gu, J. Song and H. Zeng, *Advanced Functional Materials*, 2016, **26**, 2435-2445.
2. Q. Chen, J. Wu, X. Ou, B. Huang, J. Almutlaq, A. A. Zhumekenov, X. Guan, S. Han, L. Liang, Z. Yi, J. Li, X. Xie, Y. Wang, Y. Li, D. Fan, D. B. L. Teh, A. H. All, O. F. Mohammed, O. M. Bakr, T. Wu, M. Bettinelli, H. Yang, W. Huang and X. Liu, *Nature*, 2018, 561, 88-93.
3. D. Zhang, Y. Xu, Q. Liu and Z. Xia, *Inorganic Chemistry*, 2018, **57**, 4613-4619.
4. D. Zhang, W. Zhou, Q. Liu and Z. Xia, *Acs Applied Materials & Interfaces*, 2018, **10**, 27875-27884.
5. J.-H. Cha, K. Noh, W. Yin, Y. Lee, Y. Park, T. K. Ahn, A. Mayoral, J. Kim, D.-Y. Jung and O. Terasaki, *Journal of Physical Chemistry Letters*, 2019, **10**, 2270-2277.
6. C.-C. Lee, C.-I. Chen, Y.-T. Liao, K. C. W. Wu and C.-C. Chueh, *Advanced Science*, 2019, **6**.
7. D. Zhang, J. Zhao, Q. Liu and Z. Xia, *Inorganic Chemistry*, 2019, **58**, 1690-1696.
8. S. Mollick, T. N. Mandal, A. Jana, S. Fajal, A. V. Desai and S. K. Ghosh, *Acs Applied Nano Materials*, 2019, **2**, 1333-1340.
9. D. Rambabu, S. Bhattacharyya, T. Singh, M. L. Chakravarthy and T. K. Maji, *Inorganic Chemistry*, 2020, **59**, 1436-1443.
10. L. Protesescu, J. Calbo, K. Williams, W. Tisdale, A. Walsh and M. Dinca, *Chemical Science*, 2021, **12**, 6129-6135.
